# Supplementary material
Source: PubMed Central journal article supplement (PMC6498162)
Supplement: AEM.03090-18-s0001.pdf [file AEM.03090-18-s0001.pdf]

1 **Supplemental Information for**

2

3 **Construction of synthetic microbiota for reproducible flavor**  
4 **metabolism in Chinese light aroma type liquor produced by solid-**  
5 **state fermentation**

6 Shilei Wang<sup>a, b</sup>, Qun Wu<sup>a, b, \*</sup>, Yao Nie<sup>a</sup>, Jianfeng Wu<sup>c</sup>, Yan Xu<sup>a, \*</sup>

7 <sup>a</sup> State Key Laboratory of Food Science and Technology, Synergetic Innovation  
8 Center of Food Safety and Nutrition, School of Biotechnology, Jiangnan University,  
9 Wuxi, Jiangsu, 214122, China.

10 <sup>b</sup> Suqian Industrial Technology Research Institute of Jiangnan University, Suqian,  
11 Jiangsu, 223800, China.

12 <sup>c</sup> Jiangsu King's Luck Wine Co., Ltd., Huaian, Jiangsu, 223411, China.

13

14 **\*Corresponding author:**

15 State Key Laboratory of Food Science and Technology, Synergetic Innovation Center  
16 of Food Safety and Nutrition, School of Biotechnology, Jiangnan University, Wuxi,  
17 Jiangsu, 214122, China.

18 Phone: +86-510-85864112

19 Fax: +86-510-85864112

20 E-mail: wuq@jiangnan.edu.cn (Q. Wu), yxu@jiangnan.edu.cn (Y. Xu).

21

22 **Running headline:** Synthetic microbiota in food fermentation

- 23 **This supplementary files include:**
- 24 Supplementary figures: Fig. S1 - S4;
- 25 Supplementary tables: Table S1 - S9;
- 26 Supplementary datasets: Dataset S1 - S3.

27 **Supplementary figures:**

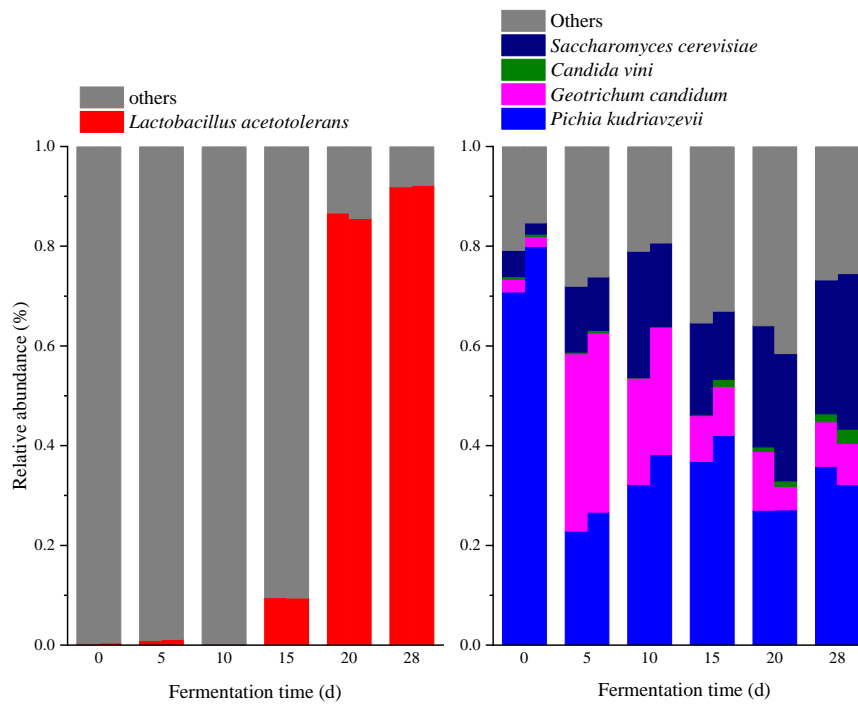

28

29 Fig. S1. The five species relative abundance of core microbiota during the

30 fermentation in the *in situ* System.

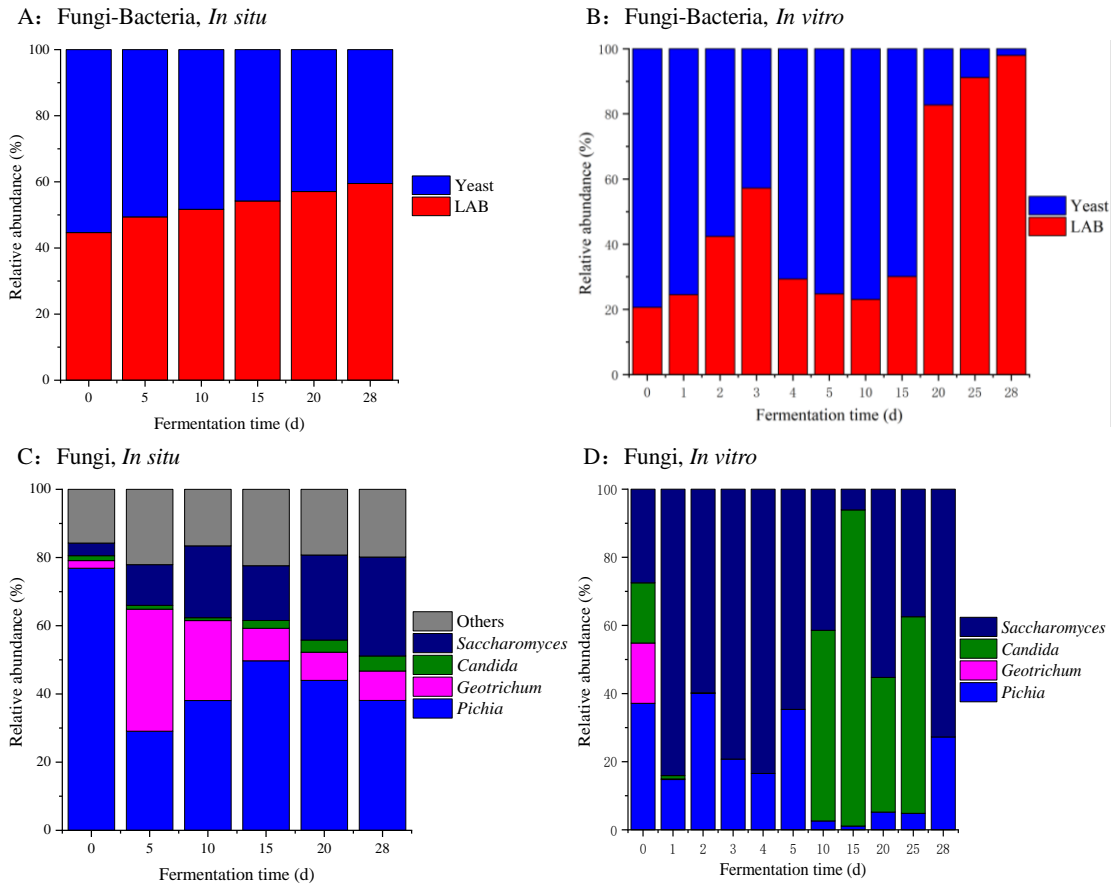

31

32 Fig. S2. Comparison of microbial composition in two systems. (A) The percent of  
 33 yeasts and LAB in the *in situ* system. (B) The percent of yeasts and LAB in the *in vitro*  
 34 system. (C) The percent of yeasts in the *in situ* system. (D) The percent of yeasts in the  
 35 *in vitro* system.

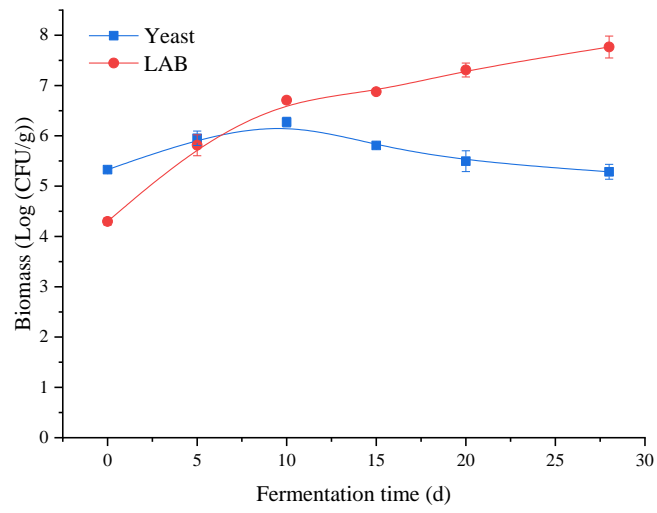

36

37 Fig. S3. The biomass changes of yeast and LAB in the *in situ* system

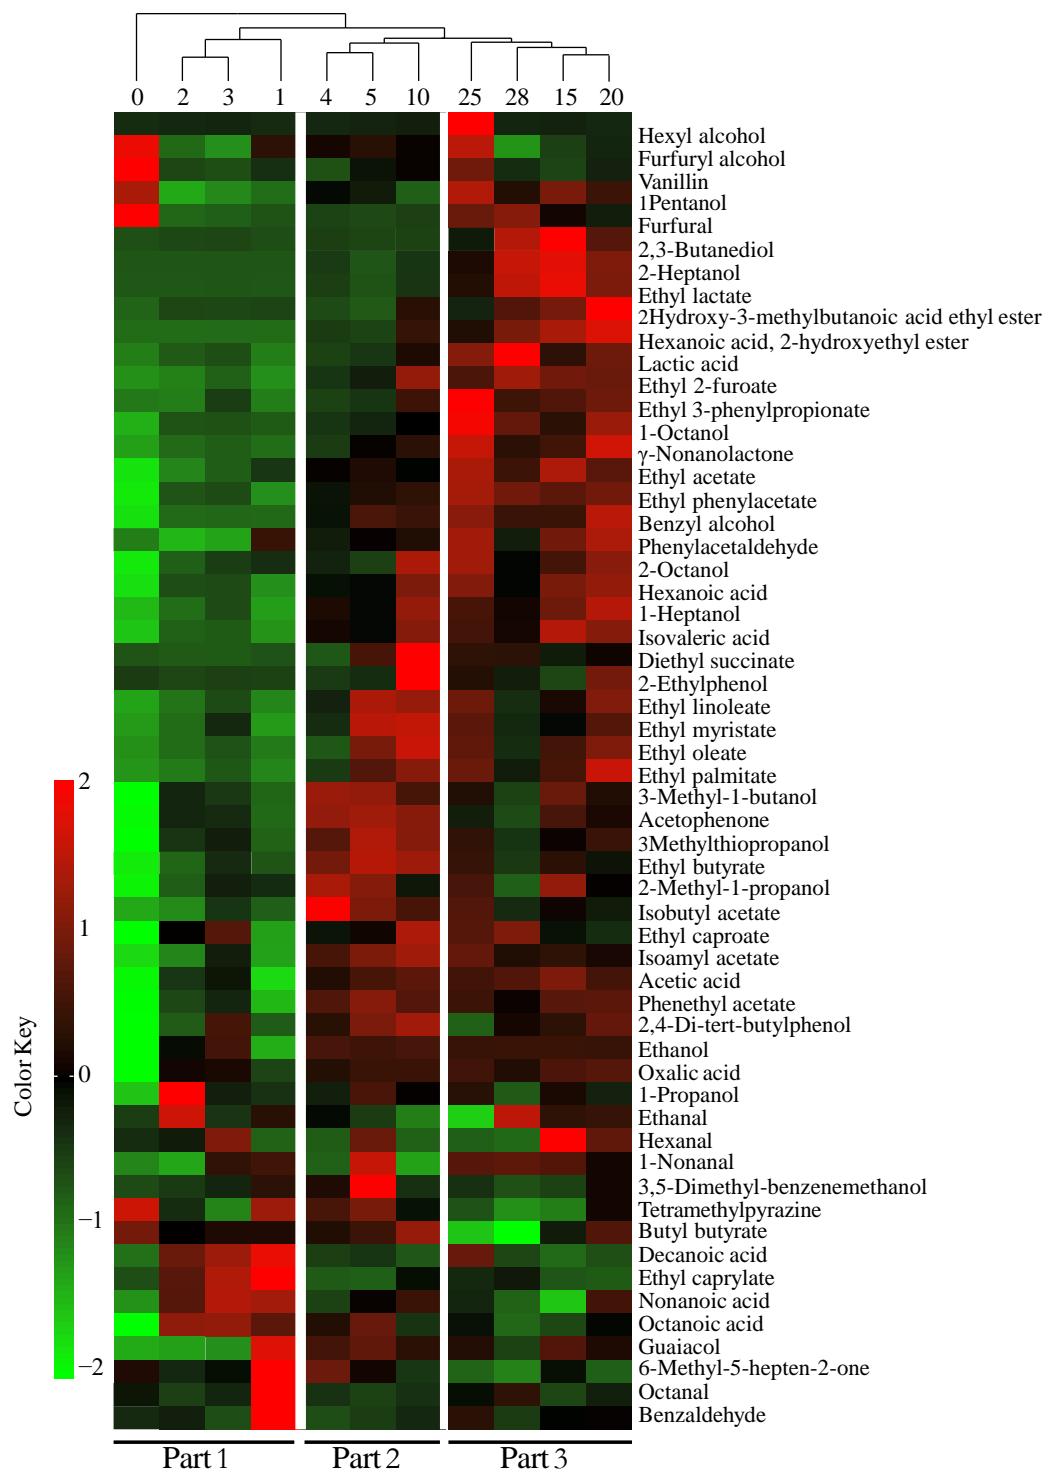

38

39 Fig. S4. Heatmap of flavor metabolites and hierarchical clustering in the *in vitro*

40 fermentation process. Flavor compounds were transformed by z-score. Clustering

41 analysis was performed using Pearson correlation coefficient and Euclidean distance

42 based on the flavor compound contents during the fermentation process.

43 **Supplementary tables:**

44 Table S1. Bacterial and fungal statistical information about Illumina sequencing results during the fermentation process.

| Sample ID | Bacteria |      |                 |       |         | fungi |      |                 |        |         |
|-----------|----------|------|-----------------|-------|---------|-------|------|-----------------|--------|---------|
|           | Reads    | OTUs | Good's coverage | Chao1 | Shannon | Reads | OTUs | Good's coverage | Chao1  | Shannon |
| 0-1       | 25104    | 81   | 99.95%          | 79.33 | 2.62    | 74017 | 101  | 99.91%          | 97.30  | 2.05    |
| 0-2       | 37867    | 94   | 99.96%          | 89.88 | 4.45    | 50235 | 98   | 99.92%          | 96.35  | 1.50    |
| 5-1       | 51207    | 52   | 99.95%          | 37.55 | 1.48    | 67964 | 108  | 99.91%          | 100.21 | 3.09    |
| 5-2       | 16623    | 42   | 99.93%          | 45.50 | 1.49    | 63428 | 105  | 99.89%          | 111.07 | 3.01    |
| 10-1      | 29386    | 34   | 99.93%          | 46.33 | 0.90    | 22411 | 73   | 99.93%          | 82.39  | 2.99    |
| 10-2      | 32275    | 55   | 99.90%          | 65.00 | 1.47    | 39621 | 113  | 99.90%          | 114.48 | 2.88    |
| 15-1      | 37811    | 59   | 99.93%          | 52.88 | 2.39    | 71038 | 123  | 99.89%          | 120.83 | 3.26    |
| 15-2      | 50874    | 65   | 99.88%          | 78.50 | 2.31    | 33937 | 108  | 99.91%          | 112.80 | 3.18    |
| 20-1      | 26684    | 29   | 99.97%          | 28.50 | 0.83    | 44646 | 122  | 99.89%          | 125.97 | 3.44    |
| 20-2      | 25854    | 35   | 99.93%          | 37.50 | 0.88    | 38933 | 117  | 99.90%          | 117.87 | 3.33    |
| 28-1      | 38417    | 34   | 99.91%          | 51.00 | 0.52    | 30936 | 118  | 99.87%          | 148.81 | 3.37    |
| 28-2      | 41758    | 29   | 99.95%          | 26.00 | 0.49    | 47662 | 112  | 99.91%          | 109.51 | 3.22    |

46 Table S2. The constitution of ubiquitously distributed microbiota. The number represent  
47 the presence of corresponding microbes in 14 samples.

| Microbes                | Number of samples |
|-------------------------|-------------------|
| <i>Lactobacillus</i>    | 14                |
| <i>Pediococcus</i>      | 13                |
| <i>Pichia</i>           | 14                |
| <i>Geotrichum</i>       | 14                |
| <i>Saccharomyces</i>    | 14                |
| <i>Saccharomycopsis</i> | 14                |
| <i>Rhizopus</i>         | 11                |
| <i>Aspergillus</i>      | 13                |
| <i>Candida</i>          | 11                |
| <i>Thermoascus</i>      | 8                 |

48



49 Table S3. The constitution of flavor-producing microbiota. The number represent kinds  
 50 of flavor compounds which correlated with microbes.

| Microbes              | Number of<br>flavor compounds | Microbes              | Number of<br>flavor compounds |
|-----------------------|-------------------------------|-----------------------|-------------------------------|
| <i>Lactobacillus</i>  | 26                            | <i>Kroppenstedtia</i> | 1                             |
| <i>Saccharomyces</i>  | 26                            | <i>Pediococcus</i>    | 1                             |
| <i>Clavispora</i>     | 16                            | <i>Pichia</i>         | 1                             |
| <i>Candida</i>        | 14                            | <i>Staphylococcus</i> | 1                             |
| <i>Aspergillus</i>    | 2                             | <i>Streptomyces</i>   | 1                             |
| <i>Bacillus</i>       | 1                             | <i>Thermomyces</i>    | 1                             |
| <i>Geotrichum</i>     | 1                             | <i>Trichosporon</i>   | 1                             |
| <i>Herbaspirillum</i> | 1                             | <i>Weissella</i>      | 1                             |

52 Table S4. The constitution of co-occurring microbiota. The number represent the kinds of microbes which co-occurrence with the corresponding  
 53 microbes. The rate represent the ratio of co-occurrences' number in the total co-occurrences' number.

| Microbes              | Number of<br>co-occurrences | co-occurrence<br>rate (%) | Microbes                | Number of<br>co-occurrences | co-occurrence<br>rate (%) |
|-----------------------|-----------------------------|---------------------------|-------------------------|-----------------------------|---------------------------|
| <i>Flavobacterium</i> | 24                          | 8.05%                     | <i>Clavispora</i>       | 10                          | 3.36%                     |
| <i>Lactobacillus</i>  | 22                          | 7.38%                     | <i>Geotrichum</i>       | 10                          | 3.36%                     |
| <i>Brevibacterium</i> | 20                          | 6.71%                     | <i>Lichtheimia</i>      | 10                          | 3.36%                     |
| <i>Herbaspirillum</i> | 20                          | 6.71%                     | <i>Thermoascus</i>      | 10                          | 3.36%                     |
| <i>Pichia</i>         | 20                          | 6.71%                     | <i>Rhizopus</i>         | 8                           | 2.68%                     |
| <i>Staphylococcus</i> | 20                          | 6.71%                     | <i>Achromobacter</i>    | 6                           | 2.01%                     |
| <i>Bacillus</i>       | 18                          | 6.04%                     | <i>Pseudomonas</i>      | 6                           | 2.01%                     |
| <i>Weissella</i>      | 18                          | 6.04%                     | <i>Stenotrophomonas</i> | 6                           | 2.01%                     |
| <i>Kroppenstedtia</i> | 16                          | 5.37%                     | <i>Candida</i>          | 4                           | 1.34%                     |
| <i>Leuconostoc</i>    | 14                          | 4.70%                     | <i>Saccharomycopsis</i> | 4                           | 1.34%                     |
| <i>Saccharomyces</i>  | 14                          | 4.70%                     | <i>Streptomyces</i>     | 4                           | 1.34%                     |
| <i>Aspergillus</i>    | 10                          | 3.36%                     |                         |                             |                           |

55 Table S5. The changing of environmental factors in the *in situ* fermentation process.

| Sample ID | Lactic acid (mg/g) | Ethanol (mg/g) | Acetic acid (mg/g) | Moisture (%) | pH   |
|-----------|--------------------|----------------|--------------------|--------------|------|
| 0-1       | 3.94               | 3.62           | 0.00               | 55.43%       | 4.98 |
| 0-2       | 3.86               | 4.56           | 0.00               | 55.33%       | 4.96 |
| 5-1       | 9.19               | 28.86          | 0.43               | 61.92%       | 4.00 |
| 5-2       | 9.45               | 34.19          | 0.38               | 67.03 %      | 5.86 |
| 10-1      | 12.96              | 45.34          | 0.53               | 66.77%       | 3.85 |
| 10-2      | 12.92              | 43.30          | 0.76               | 65.90%       | 3.98 |
| 15-1      | 17.64              | 56.64          | 0.97               | 66.80%       | 3.81 |
| 15-2      | 15.71              | 60.81          | 1.25               | 63.36%       | 3.72 |
| 20-1      | 14.82              | 78.16          | 1.52               | 65.32%       | 3.67 |
| 20-2      | 15.84              | 78.19          | 1.13               | 66.72%       | 3.73 |
| 28-1      | 17.11              | 72.79          | 2.03               | 67.64%       | 3.51 |
| 28-2      | 14.30              | 75.29          | 3.11               | 65.49%       | 3.41 |

57 Table S6. Explanations of variation partitioning analysis of the core microbiota with  
58 environmental factors in the *in situ* and *in vitro* systems.

| Fermentation system | Constrained | Unconstrained |
|---------------------|-------------|---------------|
| <i>In situ</i>      | 73.03%      | 26.97%        |
| <i>In vitro</i>     | 53.65%      | 46.35%        |

59

60 Table S7. Monte Carlo permutation test of the core microbiota with environmental  
 61 factors in the *in situ* and *in vitro* systems.

| Monte Carlo<br>permutation test | <i>In situ</i>       |          | <i>In vitro</i> |          |
|---------------------------------|----------------------|----------|-----------------|----------|
|                                 | r <sup>2</sup>       | <i>P</i> | r <sup>2</sup>  | <i>P</i> |
| pH                              | 0.4947* <sup>a</sup> | 0.017    | 0.7980***       | 0.001    |
| Moisture (%)                    | 0.7118**             | 0.002    | 0.7588***       | 0.001    |
| Ethanol (mg/g)                  | 0.8217***            | 0.001    | 0.7228***       | 0.001    |
| Acetic acid (mg/g)              | 0.8197***            | 0.001    | 0.5180***       | 0.001    |
| Lactic acid (mg/g)              | 0.6323**             | 0.005    | 0.6620***       | 0.001    |

62 <sup>a</sup> Significance codes: 0 '\*\*\*' 0.001 '\*\*' 0.01 '\*' 0.05

63 Table S8. The species of core microbiota. Similarity were based on comparison results  
 64 of NCBI Blast. Maximum relative abundance were calculated based on 14 samples in  
 65 the related genus.

| Core microbiota      | Dominant species                   | Similarity (%) | Maximum relative abundance (%) |
|----------------------|------------------------------------|----------------|--------------------------------|
| <i>Lactobacillus</i> | <i>Lactobacillus acetotolerans</i> | 100%           | 93.50%                         |
| <i>Pichia</i>        | <i>Pichia kudriavzevii</i>         | 100%           | 98.28%                         |
| <i>Geotrichum</i>    | <i>Geotrichum candidum</i>         | 100%           | 100.00%                        |
| <i>Candida</i>       | <i>Candida vini</i>                | 100%           | 53.54%                         |
| <i>Saccharomyces</i> | <i>Saccharomyces cerevisiae</i>    | 100%           | 98.88%                         |

66

67 Table S9. The changing of environmental factors in the *in vitro* fermentation process.

| Fermentation time (d) | Lactic acid (mg/g)       | Ethanol (mg/g) | Acetic acid (mg/g) | Moisture (%) | pH          |
|-----------------------|--------------------------|----------------|--------------------|--------------|-------------|
| 0                     | n. d <sup>a</sup>        | 0.82 ± 0.01    | n. d               | 57.85 ± 0.52 | 6.39 ± 0.00 |
| 1                     | n. d                     | 14.10 ± 0.34   | 0.06 ± 0.01        | 59.23 ± 1.06 | 5.44 ± 0.02 |
| 2                     | 2.08 ± 0.06 <sup>b</sup> | 31.41 ± 0.05   | 0.42 ± 0.01        | 63.02 ± 0.04 | 4.70 ± 0.01 |
| 3                     | 2.80 ± 0.17              | 38.96 ± 0.34   | 0.51 ± 0.06        | 63.99 ± 0.69 | 4.56 ± 0.04 |
| 4                     | 3.63 ± 0.37              | 39.61 ± 0.96   | 0.61 ± 0.04        | 64.07 ± 0.90 | 4.53 ± 0.03 |
| 5                     | 4.29 ± 0.34              | 38.48 ± 0.46   | 0.70 ± 0.03        | 64.80 ± 0.12 | 4.44 ± 0.04 |
| 10                    | 8.60 ± 0.40              | 39.61 ± 0.33   | 0.76 ± 0.03        | 64.94 ± 0.51 | 3.95 ± 0.08 |
| 15                    | 9.82 ± 0.59              | 38.08 ± 0.28   | 0.83 ± 0.01        | 64.18 ± 0.24 | 3.94 ± 0.01 |
| 20                    | 13.71 ± 0.37             | 37.55 ± 0.14   | 0.70 ± 0.08        | 63.72 ± 0.26 | 3.80 ± 0.07 |
| 25                    | 15.02 ± 1.75             | 37.56 ± 0.32   | 0.69 ± 0.00        | 64.58 ± 0.28 | 3.63 ± 0.14 |
| 28                    | 21.59 ± 0.3              | 38.08 ± 0.33   | 0.73 ± 0.18        | 65.12 ± 0.78 | 3.62 ± 0.14 |

68 <sup>a</sup> "n. d" indicates not detected.69 <sup>b</sup> Values are shown as the mean ± SD (n = 3) (mg/g wet weight).
